# Supplementary material for: The pleiotropic effect of WD-40 domain containing proteins on cellular differentiation and production of secondary metabolites in Streptomyces coelicolor
Source: Royal Society of Chemistry journal article supplement (doi:10.1039/c3mb25542e), 2013-03-08
Supplement: c3mb25542e.pdf [file c3mb25542e.pdf]

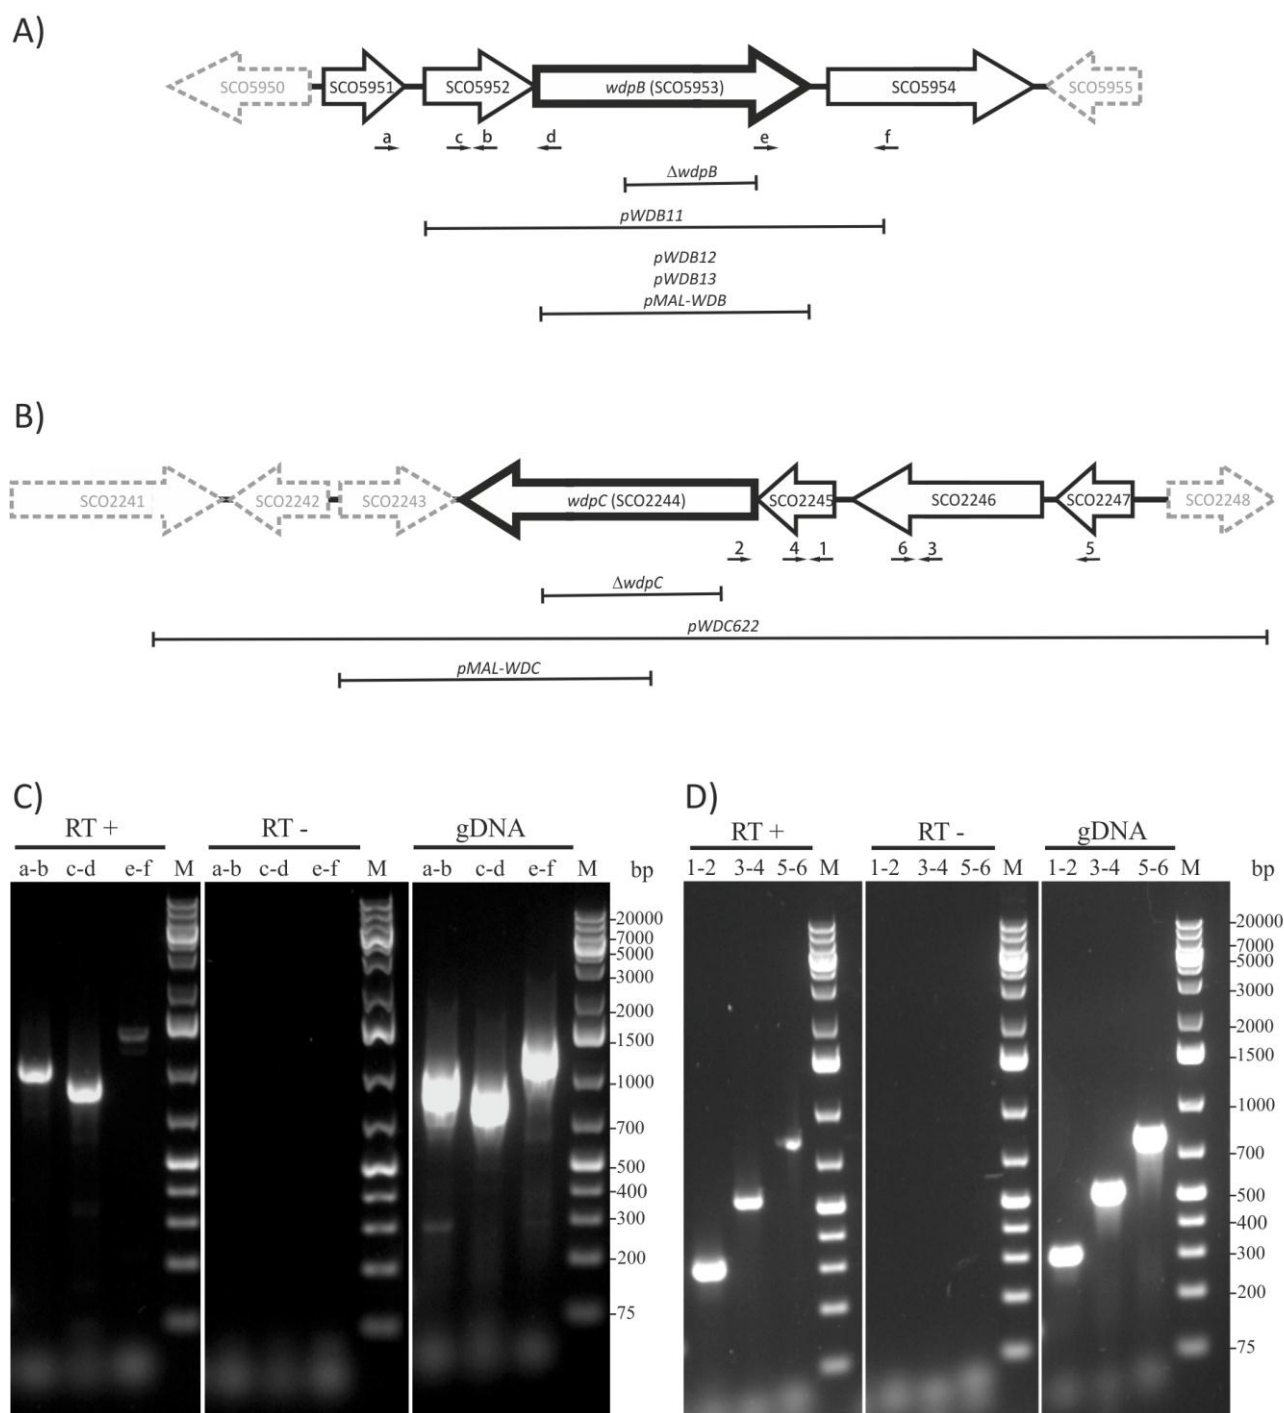

**Fig. S1** Organization of the *S. coelicolor* M145 chromosome near *wdpB* and *wdpC* genes and cotranscription analysis of SCO5951-3 and SCO2244-7 genes; schematic representation of *wdpB* and *wdpC* genome regions. DNA sequences deleted and replaced with apramycin resistance gene in both  $\Delta wdpB$  and  $\Delta wdpC$  mutant strains as well as DNA fragments that were cloned into vectors pWDB11, pWDB12, pWDB13, pMAL-WDB, pWDC622 and pMAL-WDC for overexpression and complementation experiments are represented by bars (panels **A** and **B**). To determine transcriptional organisation of *wdpB* and *wdpC* genome regions RNA was extracted from mycelium cultivated on modified R3 agar and harvested after 48 h. RT-PCR reactions containing primer pairs a+b, c+d and e+f (primer position is indicated in panel **A**) were used to detect the cotranscription of SCO5951-2 (a+b), SCO5952-3 (c+d) and SCO5953-4 (e+f), respectively (panel **C**). Similarly, RT-PCR reactions containing primer pairs 1+2, 3+4 and 5+6 (primer position is indicated in panel **B**) were used to detect the cotranscription of SCO2244-5 (1-2), SCO2245-6 (3-4) and SCO2246-7 (5-6), respectively (panel **D**). RT-PCR reactions were performed in the presence (+) or the absence (-) of reverse transcriptase (RT). Genomic DNA (gDNA) was used as a positive control for the PCR conditions. PCR products were separated on 1.5% agarose gel. The integrity of the cDNA samples was verified by the primer pair specific for the *hrdB* gene (data not shown). M – size marker.

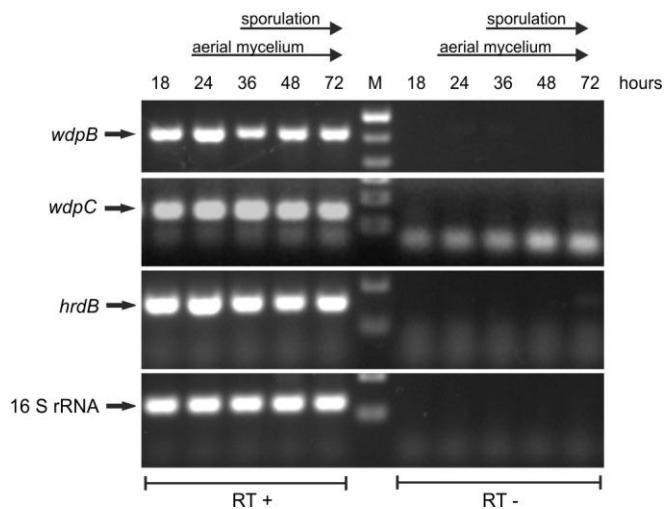

**Fig. S2** The presence of *wdpB* and *wdpC* transcripts determined by RT-PCR throughout development of *S. coelicolor* M145. The total RNA extracted from mycelium after 18, 24, 36, 48 and 72 hours of growth on modified R3 solid media was subjected to cDNA synthesis and subsequent RT-PCR. cDNA synthesized in presence (+) and absence (-) of reverse transcriptase (RT) was used for RT-PCR. *hrdB* and 16S rRNA genes were used as reference genes with constant gene expression during development (data not shown). PCR products were separated on a 1.5% agarose gel in TAE 1x buffer. M – size marker.

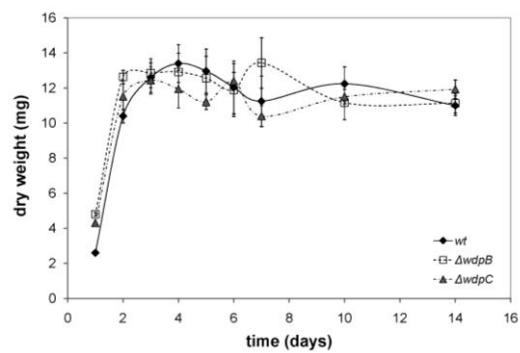

**Fig. S3** Growth kinetics of the  $\Delta wdpB$  and  $\Delta wdpC$  strains. The wild-type strain (*wt*) and both mutants were cultivated 14 days on modified R3 plates. The growth was calculated as mg of dry weight of mycelium. The standard errors of the means for four independent experiments are shown.

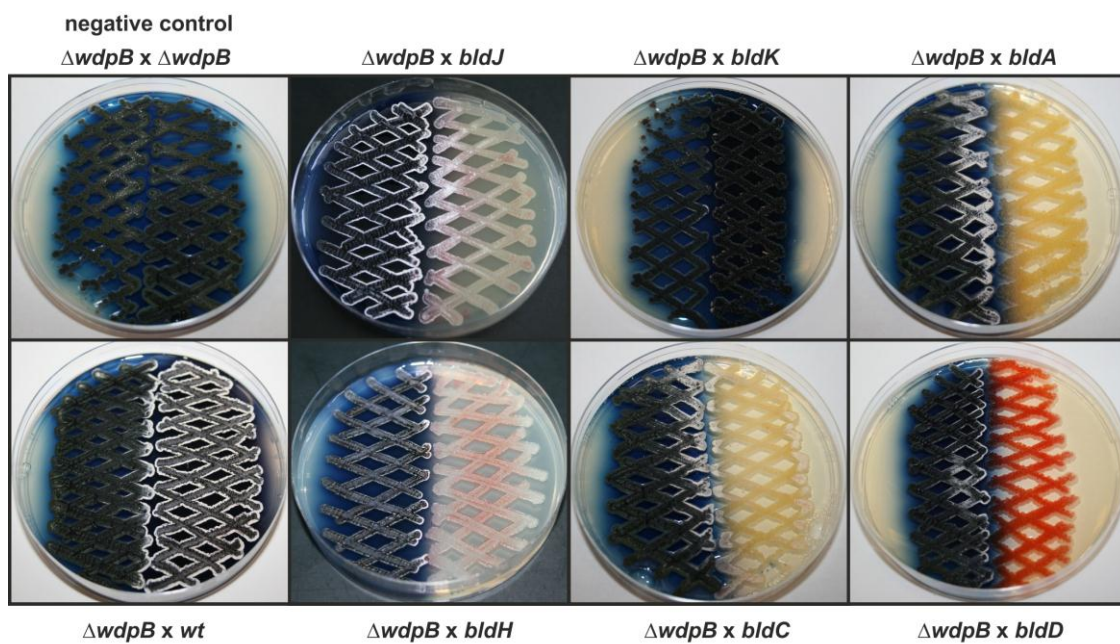

**Fig. S4** Extracellular complementation of the  $\Delta wdpB$  mutant and bald mutants. The  $\Delta wdpB$  mutant was grown in close proximity to the wild-type strain (positive control),  $\Delta wdpB$  mutant alone (negative control) and to the developmentally blocked *bldJ*, *bldK*, *bldA*, *bldH*, *bldC* and *bldD* mutants. Images were taken after 4 days of growth on R2YE agar plates.

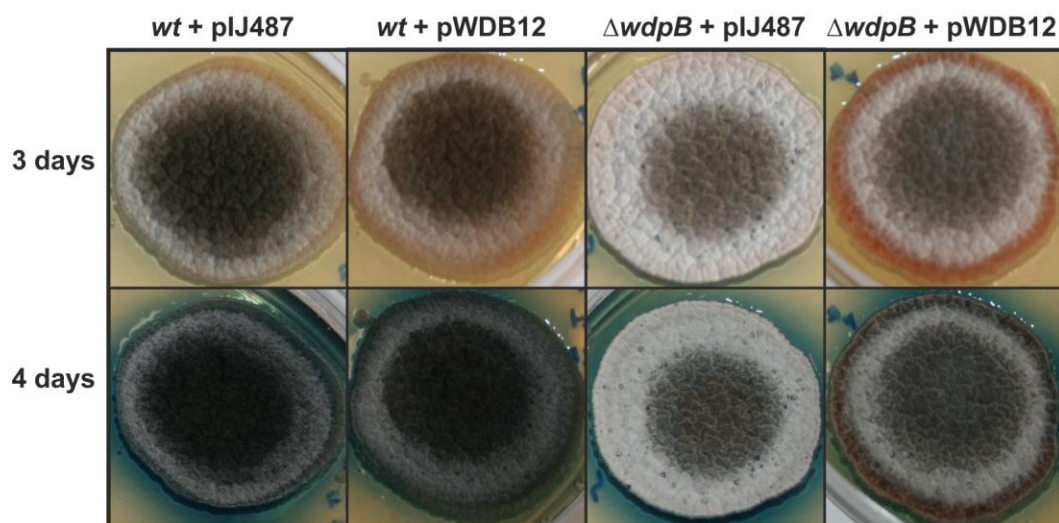

**Fig. S5** Overexpression and genetic complementation of the  $\Delta wdpB$  mutant strain based on high-copy number vector pIJ487. The wild-type strain *wt* + pIJ487, mutant strain  $\Delta wdpB$  + pIJ487, *wdpB*-overexpression strain *wt* + pWDB12 and complemented strain  $\Delta wdpB$  + pWDB12 were cultivated on modified R3 solid plates. The images were taken after growth for 3 and 4 days. The overexpression strain *wt* + pWDB12 exhibited the same phenotype as wild-type strain *wt* + pIJ487. The complemented strain  $\Delta wdpB$  + pWDB12 showed recovery of the wild-type phenotype.

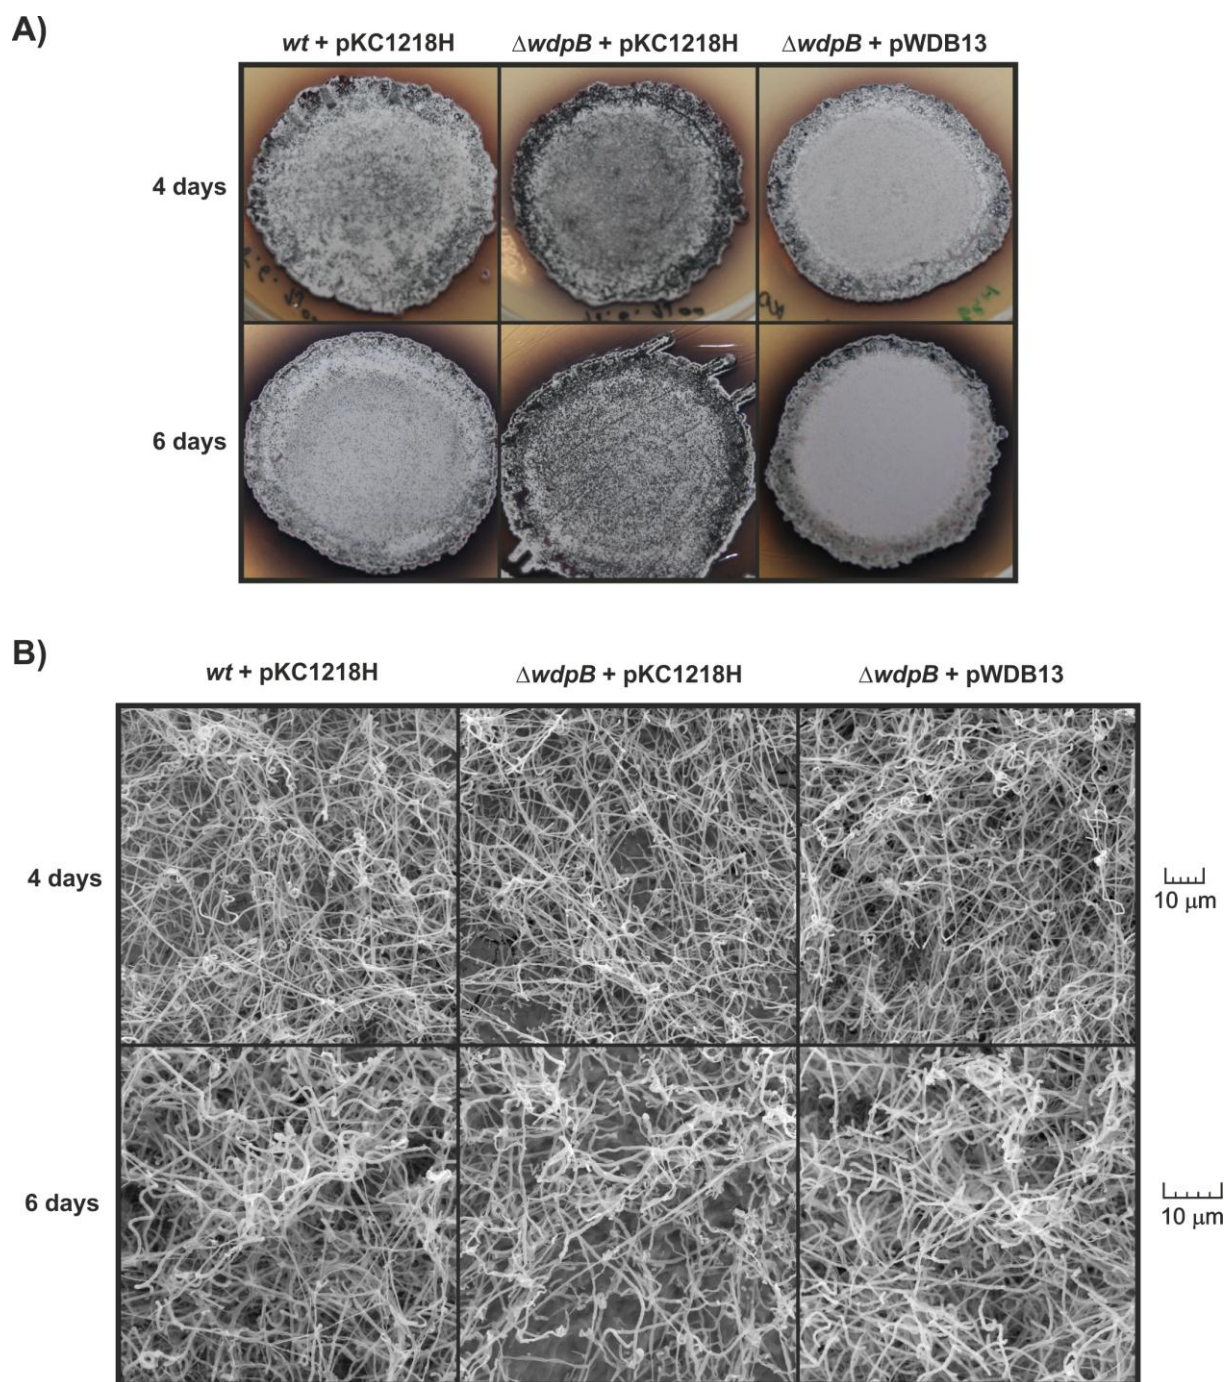

**Fig. S6** Genetic complementation of the  $\Delta wdpB$  mutant strain based on low-copy number vector pKC1218H. The wild-type strain *wt* + pKC1218H, mutant strain  $\Delta wdpB$  + pKC1218H and complemented strain  $\Delta wdpB$  + pWDB13 were cultivated on GYM solid plates. Macroscopic images (**A**) and scanning electron micrographs (**B**) were taken after growth for 4 and 6 days. The complemented strain  $\Delta wdpB$  + pWDB13 recovered the ability of aerial mycelium formation and sporulation similarly to that of the wild-type strain *wt* + pKC1218H.

**Table S1** *S. coelicolor* genes affected in the  $\Delta wdpB$  mutant compared to the wild-type strain M145 – comparison of gene transcript levels between microarray analysis and qRT-PCR analysis

| Functional category                                                         | Gene no. | Gene product (gene)                                                           | DNA microarrays |                          | qRT-PCR                  |
|-----------------------------------------------------------------------------|----------|-------------------------------------------------------------------------------|-----------------|--------------------------|--------------------------|
|                                                                             |          |                                                                               | P-value         | Fold change <sup>a</sup> | Fold change <sup>a</sup> |
| <b><u>1. wdpB gene and neighbouring SCO5954 gene</u></b>                    |          |                                                                               |                 |                          |                          |
|                                                                             | SCO5953  | putative membrane protein with WD-40 repetitive domains ( <i>wdpB</i> )       | 0.000           | 2.92                     | 19.54 (± 3.74)           |
|                                                                             | SCO5954  | probable chitinase (putative secreted protein)                                | 0.001           | 12.43                    | 34.51 (± 7.14)           |
| <b><u>2. Aerial hyphae formation and its subsequent differentiation</u></b> |          |                                                                               |                 |                          |                          |
| <b>a) Chaplins</b>                                                          |          |                                                                               |                 |                          |                          |
|                                                                             | SCO7257  | <i>chpB</i>                                                                   | 0.032           | -2.11                    | -1.12 (± 0.55)           |
|                                                                             | SCO1674  | <i>chpC</i>                                                                   | 0.000           | -3.40                    | -2.69 (± 0.60)           |
|                                                                             | SCO2717  | <i>chpD</i>                                                                   | 0.000           | -3.83                    | -3.55 (± 1.11)           |
|                                                                             | SCO1800  | <i>chpE</i>                                                                   | 0.003           | -1.76                    | -1.97 (± 0.20)           |
|                                                                             | SCO1675  | <i>chpH</i>                                                                   | 0.000           | -2.66                    | -10.24 (± 3.69)          |
| <b>b) Rodlins</b>                                                           |          |                                                                               |                 |                          |                          |
|                                                                             | SCO2718  | <i>rdlA</i>                                                                   | 0.000           | -13.50                   | -15.19 (± 7.95)          |
|                                                                             | SCO2719  | <i>rdlB</i>                                                                   | 0.001           | -6.29                    | -9.59 (± 3.14)           |
| <b>c) ram gene cluster</b>                                                  |          |                                                                               |                 |                          |                          |
|                                                                             | SCO6681  | putative serine/threonine protein kinase ( <i>ramC</i> )                      | 0.001           | -3.87                    | -3.49 (± 0.61)           |
|                                                                             | SCO6682  | surface-active peptide SapB ( <i>ramS</i> )                                   | 0.000           | -5.95                    | -17.51 (± 7.15)          |
|                                                                             | SCO6683  | probable ABC transporter ( <i>ramA</i> )                                      | 0.003           | -2.20                    |                          |
|                                                                             | SCO6684  | probable ABC transporter ( <i>ramB</i> )                                      | 0.001           | -2.42                    |                          |
|                                                                             | SCO6685  | two-component system response regulator ( <i>ramR</i> )                       | 0.004           | -2.25                    | -2.27 (± 0.51)           |
| <b>d) nepA gene</b>                                                         |          |                                                                               |                 |                          |                          |
|                                                                             | SCO4002  | <i>nepA</i>                                                                   | 0.000           | -2.61                    | -4.31 (± 0.59)           |
| <b><u>3. Sporulation</u></b>                                                |          |                                                                               |                 |                          |                          |
|                                                                             | SCO4675  | conserved hypothetical protein                                                | 0.000           | -2.69                    |                          |
|                                                                             | SCO4676  | hypothetical protein                                                          | 0.000           | -2.00                    |                          |
|                                                                             | SCO4677  | putative regulatory protein; probably anti- $\sigma^F$ factor ( <i>ryfA</i> ) | 0.000           | -2.04                    | -2.58 (± 0.46)           |
|                                                                             | SCO5321  | polyketide hydroxylase ( <i>whiE</i> , <i>ORFVIII</i> )                       | 0.011           | -2.08                    | -1.15 (± 0.22)           |
|                                                                             | SCO5819  | sporulation transcription factor ( <i>whiH</i> )                              | 0.004           | -2.64                    | -3.42 (± 0.01)           |
|                                                                             | SCO6029  | two-component regulator ( <i>whiI</i> )                                       | 0.000           | 3.79                     |                          |
| <b><u>4. Secondary metabolism</u></b>                                       |          |                                                                               |                 |                          |                          |
|                                                                             | SCO6992  | regulatory protein ( <i>absR1</i> )                                           | 0.013           | -3.45                    | -8.95 (± 4.23)           |
| <b>a) Calcium-dependent antibiotics</b>                                     |          |                                                                               |                 |                          |                          |
|                                                                             | SCO3210  | probable 2-dehydro-3-deoxyheptonate aldolase                                  | 0.010           | -2.20                    |                          |
|                                                                             | SCO3214  | probable anthranilate synthase component I ( <i>trpE2</i> )                   | 0.018           | -2.95                    |                          |
|                                                                             | SCO3215  | hypothetical protein                                                          | 0.002           | -2.07                    |                          |
|                                                                             | SCO3217  | transcriptional activator for the CDA biosynthesis cluster ( <i>cdaR</i> )    | 0.006           | -1.40                    | -1.88 (± 0.63)           |
|                                                                             | SCO3218  | putative small conserved hypothetical protein                                 | 0.003           | -2.07                    |                          |
|                                                                             | SCO3220  | putative secreted protein                                                     | 0.000           | -2.90                    |                          |
|                                                                             | SCO3221  | probable oxidoreductase                                                       | 0.000           | -2.91                    |                          |
|                                                                             | SCO3222  | possible small secreted protein                                               | 0.000           | -2.55                    |                          |
|                                                                             | SCO3227  | putative aminotransferase                                                     | 0.001           | -2.70                    |                          |
|                                                                             | SCO3229  | putative 4-hydroxyphenylpyruvic acid dioxygenase                              | 0.000           | -2.97                    |                          |
|                                                                             | SCO3230  | CDA peptide synthetase I ( <i>cdaPS1</i> )                                    | 0.004           | -2.41                    | -2.27 (± 0.73)           |
|                                                                             | SCO3231  | CDA peptide synthetase II ( <i>cdaPS2</i> )                                   | 0.005           | -2.14                    | -2.67 (± 0.39)           |
|                                                                             | SCO3232  | CDA peptide synthetase III ( <i>cdaPS3</i> )                                  | 0.016           | -2.15                    |                          |
|                                                                             | SCO3233  | probable hydrolase                                                            | 0.001           | -2.32                    |                          |
|                                                                             | SCO3234  | possible phosphotransferase                                                   | 0.000           | -2.11                    |                          |
|                                                                             | SCO3235  | probable ABC transporter                                                      | 0.000           | -2.07                    |                          |
|                                                                             | SCO3236  | possible oxygenase                                                            | 0.000           | -2.36                    | -2.75 (± 0.39)           |
|                                                                             | SCO3237  | conserved hypothetical protein                                                | 0.009           | -2.26                    |                          |

|                                                                                      |                                                                                 |       |       |                  |
|--------------------------------------------------------------------------------------|---------------------------------------------------------------------------------|-------|-------|------------------|
| SCO3239                                                                              | conserved hypothetical protein                                                  | 0.001 | -3.22 |                  |
| SCO3241                                                                              | possible isomerase                                                              | 0.019 | -2.14 |                  |
| SCO3243                                                                              | possible myo-inositol phosphate synthase                                        | 0.000 | -2.10 |                  |
| SCO3244                                                                              | putative secreted protein                                                       | 0.000 | -2.30 |                  |
| SCO3245                                                                              | possible salicylate hydroxylase (putative secreted protein)                     | 0.004 | -2.28 |                  |
| SCO3246                                                                              | probable 3-oxoacyl-[acyl carrier protein] synthase III ( <i>fabH4</i> )         | 0.002 | -3.12 |                  |
| SCO3247                                                                              | possible acyl CoA oxidase                                                       | 0.002 | -2.32 |                  |
| SCO3248                                                                              | probable 3-oxoacyl-[acyl carrier protein] synthase II ( <i>fabF3</i> )          | 0.000 | -2.51 |                  |
| SCO3249                                                                              | probable acyl carrier protein                                                   | 0.000 | -2.32 |                  |
| <b>b) Coelichelin</b>                                                                |                                                                                 |       |       |                  |
| SCO0489                                                                              | conserved hypothetical protein                                                  | 0.007 | -2.59 |                  |
| SCO0490                                                                              | putative esterase ( <i>cchJ</i> )                                               | 0.017 | -2.33 |                  |
| SCO0492                                                                              | putative peptide synthetase ( <i>cchH</i> )                                     | 0.022 | -2.07 | -2.45 (± 0.33)   |
| SCO0494                                                                              | putative iron-siderophore binding lipoprotein ( <i>cchF</i> )                   | 0.010 | -1.98 |                  |
| SCO0498                                                                              | putative peptide monooxygenase ( <i>cchB</i> )                                  | 0.012 | -2.60 | -4.61 (± 1.70)   |
| SCO0499                                                                              | putative formyltransferase                                                      | 0.018 | -2.27 |                  |
| <b>c) Carotenoids</b>                                                                |                                                                                 |       |       |                  |
| SCO0191                                                                              | probable lycopene cyclase ( <i>crtY</i> )                                       | 0.018 | -2.18 |                  |
| SCO0193                                                                              | putative DNA-binding regulator ( <i>litR</i> )                                  | 0.000 | -2.08 |                  |
| SCO0194                                                                              | putative sigma factor ( <i>litS</i> )                                           | 0.001 | -5.58 | -4.65 (± 0.92)   |
| SCO0195                                                                              | putative lipoprotein ( <i>litA</i> )                                            | 0.001 | -3.64 |                  |
| SCO0196                                                                              | hypothetical protein ( <i>litB</i> )                                            | 0.002 | -2.33 |                  |
| <b>d) Methylisoborneol</b>                                                           |                                                                                 |       |       |                  |
| SCO7699                                                                              | nucleotide-binding protein ( <i>eshA</i> )                                      | 0.005 | -2.65 |                  |
| SCO7700                                                                              | possible cyclase                                                                | 0.002 | -3.25 |                  |
| SCO7701                                                                              | 2-methylgeranyl diphosphate synthase                                            | 0.035 | -4.02 | -3.34 (± 0.80)   |
| <b>e) Geosmin</b>                                                                    |                                                                                 |       |       |                  |
| SCO6073                                                                              | possible cyclase ( <i>geoA</i> )                                                | 0.001 | -2.77 | -3.32 (± 1.01)   |
| <b>f) Undecylprodigiosin</b>                                                         |                                                                                 |       |       |                  |
| SCO5877                                                                              | specific transcriptional activator for RED biosynthesis cluster ( <i>redD</i> ) | nd    | nd    | 1.63 (± 0.44)    |
| SCO5881                                                                              | specific transcriptional activator for RED biosynthesis cluster ( <i>redZ</i> ) | 0.052 | -1.22 | 1.20 (± 0.34)    |
| <b>5. Primary metabolism</b>                                                         |                                                                                 |       |       |                  |
| <b>a) Phosphorus metabolism</b>                                                      |                                                                                 |       |       |                  |
| SCO4139                                                                              | phosphate ABC transport system ATP-binding protein ( <i>pstB</i> )              | 0.004 | -6.31 |                  |
| SCO4140                                                                              | phosphate ABC transport system permease protein ( <i>pstA</i> )                 | 0.017 | -4.08 |                  |
| SCO4141                                                                              | phosphate ABC transport system permease protein ( <i>pstC</i> )                 | 0.025 | -2.64 |                  |
| SCO4142                                                                              | phosphate-binding protein precursor ( <i>pstS</i> )                             | 0.012 | -4.08 | -22.37 (± 10.08) |
| SCO4144                                                                              | conserved hypothetical protein                                                  | 0.022 | -1.82 |                  |
| SCO4145                                                                              | polyphosphate kinase ( <i>ppk</i> )                                             | 0.000 | -2.09 |                  |
| SCO1845                                                                              | low-affinity phosphate transport protein ( <i>pitH2</i> )                       | 0.021 | -2.20 | -1.46 (± 0.70)   |
| <b>b) Sulphur metabolism</b>                                                         |                                                                                 |       |       |                  |
| SCO6095                                                                              | probable ABC transporter ATP-binding protein                                    | 0.009 | -3.04 |                  |
| SCO6096                                                                              | probable lipoprotein                                                            | 0.008 | -3.32 |                  |
| SCO6099                                                                              | adenylsulfate kinase ( <i>cysC</i> )                                            | 0.013 | -2.24 | -7.44 (± 3.95)   |
| SCO6100                                                                              | phosphoadenosine phosphosulfate reductase ( <i>cysH</i> )                       | 0.050 | -2.17 |                  |
| SCO6102                                                                              | probable nitrite/sulphite reductase                                             | 0.034 | -5.42 |                  |
| <b>c) Nitrogen metabolism</b>                                                        |                                                                                 |       |       |                  |
| SCO2404                                                                              | putative sugar-binding receptor                                                 | 0.011 | -2.61 |                  |
| SCO2405                                                                              | putative sugar-transport ATP binding protein                                    | 0.029 | -2.28 |                  |
| SCO2407                                                                              | putative aldose 1-epimerase                                                     | 0.026 | -2.70 |                  |
| <b>d) Arginine and proline metabolism</b>                                            |                                                                                 |       |       |                  |
| SCO5976                                                                              | ornithine carbamoyltransferase ( <i>arcB</i> )                                  | 0.002 | -2.05 |                  |
| SCO5980                                                                              | possible bifunctional hydroxylase/oxidoreductase                                | 0.004 | -2.04 |                  |
| SCO5983                                                                              | possible fatty acid-CoA ligase                                                  | 0.000 | -2.47 |                  |
| SCO7034                                                                              | aminotransferase; fragment                                                      | 0.010 | -2.84 |                  |
| SCO7035                                                                              | succinate-semialdehyde dehydrogenase; fragment ( <i>gabD</i> )                  | 0.003 | -3.32 | -2.24 (± 0.17)   |
| SCO7036                                                                              | argininosuccinate synthase ( <i>argG</i> )                                      | 0.004 | -1.82 |                  |
| SCO2298                                                                              | KHG/KDPG aldolase ( <i>kdgA</i> )                                               | 0.001 | -1.99 |                  |
| <b>e) Cluster of unknown function - putatively involved in saccharide metabolism</b> |                                                                                 |       |       |                  |



|         |                                                |       |       |                |
|---------|------------------------------------------------|-------|-------|----------------|
| SCO3472 | putative transposase remnant                   | 0.019 | -2.42 |                |
| SCO3473 | putative aldolase                              | 0.014 | -3.47 |                |
| SCO3474 | putative sugar kinase                          | 0.022 | -2.85 |                |
| SCO3475 | putative isomerase                             | 0.031 | -2.92 |                |
| SCO3476 | putative short-chain dehydrogenase             | 0.023 | -3.07 | -5.03 (± 2.89) |
| SCO3477 | putative dehydrogenase                         | 0.027 | -3.02 |                |
| SCO3478 | putative dehydrogenase                         | 0.017 | -3.27 |                |
| SCO3479 | putative beta-galactosidase                    | 0.029 | -2.75 |                |
| SCO3480 | putative racemase                              | 0.028 | -2.86 | -4.46 (± 2.38) |
| SCO3481 | hypothetical protein                           | 0.032 | -2.75 |                |
| SCO3482 | putative sugar-permease                        | 0.039 | -2.99 |                |
| SCO3483 | putative integral membrane transport protein   | 0.030 | -3.07 | -4.99 (± 3.15) |
| SCO3484 | putative secreted sugar-binding protein        | 0.019 | -3.21 |                |
| SCO3485 | putative lacI-family transcriptional regulator | 0.032 | -1.65 |                |
| SCO3486 | putative aldehyde dehydrogenase                | 0.018 | -2.17 |                |
| SCO3487 | putative hydrolase                             | 0.044 | -2.39 |                |
| SCO3496 | putative lyase precursor                       | 0.001 | -3.24 |                |

#### 6. Other and hypothetical genes

|         |                                                                    |       |       |  |
|---------|--------------------------------------------------------------------|-------|-------|--|
| SCO3540 | proteinase; putative secreted protein ( <i>slpD</i> )              | 0.006 | -2.01 |  |
| SCO3595 | probable D-alanine:D-lactate ligase ( <i>ddlA2</i> , <i>vanA</i> ) | 0.015 | -3.74 |  |
| SCO4873 | hypothetical protein                                               | 0.047 | -2.19 |  |
| SCO4879 | conserved hypothetical protein                                     | 0.042 | -4.40 |  |
| SCO4881 | putative polysaccharide biosynthesis related protein               | 0.030 | -5.46 |  |
| SCO4882 | hypothetical protein                                               | 0.004 | -7.36 |  |

<sup>a</sup> Fold changes represent the ratio of the expression levels in the comparison of *S. coelicolor*  $\Delta wdpB$  and wild type strain M145; positive or negative value indicate genes up- or down-regulated in the  $\Delta wdpB$  mutant. nd – not detected

**Table S2** *S. coelicolor* genes affected in the  $\Delta wdpC$  mutant compared to the wild-type strain M145 – comparison of gene transcript levels between microarray analysis and qRT-PCR analysis

| Functiona<br>l category                               | Gene no. | Gene product (gene)                                                                    | DNA microarrays |                          | qRT-PCR                  |
|-------------------------------------------------------|----------|----------------------------------------------------------------------------------------|-----------------|--------------------------|--------------------------|
|                                                       |          |                                                                                        | P-value         | Fold change <sup>a</sup> | Fold change <sup>a</sup> |
| <b>1. <i>wdpC</i> gene</b>                            |          |                                                                                        |                 |                          |                          |
|                                                       | SCO2244  | probable serine/threonine protein kinase with WD-40 repetitive domains ( <i>wdpC</i> ) | 0.000           | 8.77                     | 34.51 (± 6.64)           |
|                                                       | SCO2245  | hypothetical protein                                                                   | 0.001           | -1.25                    | 16.50 (± 4.86)           |
| <b>2. Morphological differentiation</b>               |          |                                                                                        |                 |                          |                          |
| <b>a) Aerial hyphae formation</b>                     |          |                                                                                        |                 |                          |                          |
|                                                       | SCO6681  | probable SapB synthetase ( <i>ramC</i> )                                               | 0.024           | -2.35                    | 1.15 (± 0.52)            |
|                                                       | SCO6682  | peptide SapB ( <i>rams</i> )                                                           | 0.000           | -2.42                    | -2.35 (± 0.49)           |
| <b>b) Sporulation</b>                                 |          |                                                                                        |                 |                          |                          |
|                                                       | SCO6029  | two-component regulator ( <i>whiI</i> )                                                | 0.004           | 4.44                     |                          |
| <b>3. Components of <math>\sigma^U</math> regulon</b> |          |                                                                                        |                 |                          |                          |
|                                                       | SCO0644  | putative membrane protein.                                                             | 0.012           | 2.98                     |                          |
|                                                       | SCO0930  | putative lipoprotein                                                                   | 0.025           | 2.87                     |                          |
|                                                       | SCO2217  | putative secreted protein                                                              | 0.000           | 2.91                     | 4.89 (± 0.70)            |
|                                                       | SCO0828  | putative alkaline phosphatase ( <i>phoC</i> )                                          | 0.009           | 3.05                     | -1.19 (± 0.27)           |
| <b>4. Secondary metabolism</b>                        |          |                                                                                        |                 |                          |                          |
| <b>a) Actinorhodin</b>                                |          |                                                                                        |                 |                          |                          |
|                                                       | SCO5070  | ORFB hydroxylacyl-CoA dehydrogenase ( <i>actVI ORF B</i> )                             | 0.006           | -2.44                    |                          |
|                                                       | SCO5071  | ORFA hydroxylacyl-CoA dehydrogenase ( <i>actVI ORF A</i> )                             | 0.000           | -4.84                    |                          |
|                                                       | SCO5072  | ORF1 hydroxylacyl-CoA dehydrogenase ( <i>actVI ORF 1</i> )                             | 0.000           | -3.88                    |                          |
|                                                       | SCO5073  | putative oxidoreductase ( <i>actVI ORF 2</i> )                                         | 0.001           | -3.86                    |                          |
|                                                       | SCO5074  | putative dehydratase ( <i>actVI ORF 3</i> )                                            | 0.000           | -4.41                    | -7.03 (± 3.20)           |
|                                                       | SCO5075  | possible oxidoreductase ( <i>actVI ORF 4</i> )                                         | 0.000           | -3.76                    |                          |
|                                                       | SCO5076  | integral membrane protein ( <i>actVA1</i> )                                            | 0.029           | -2.68                    |                          |
|                                                       | SCO5077  | hypothetical protein ( <i>actVA2</i> )                                                 | 0.000           | -2.25                    |                          |
|                                                       | SCO5078  | hypothetical protein ( <i>actVA3</i> )                                                 | 0.000           | -3.32                    |                          |
|                                                       | SCO5079  | conserved hypothetical protein ( <i>actVA4</i> )                                       | 0.000           | -4.49                    |                          |
|                                                       | SCO5080  | putative hydrolase ( <i>actVA5</i> )                                                   | 0.001           | -3.33                    | -6.33 (± 2.57)           |
|                                                       | SCO5081  | hypothetical protein ( <i>actVA6</i> )                                                 | 0.002           | -3.66                    |                          |
|                                                       | SCO5085  | actinorhodin cluster activator ( <i>actII-ORF4</i> )                                   | 0.001           | -3.43                    | -4.23 (± 0.68)           |
|                                                       | SCO5086  | ketoacyl reductase ( <i>actIII</i> )                                                   | 0.000           | -4.59                    |                          |
|                                                       | SCO5087  | actinorhodin polyketide beta-ketoacyl synthase alpha subunit ( <i>actI-ORF1</i> )      | 0.005           | -3.72                    | -6.93 (± 3.41)           |
|                                                       | SCO5088  | actinorhodin polyketide beta-ketoacyl synthase beta subunit ( <i>actI-ORF2</i> )       | 0.002           | -4.66                    |                          |
|                                                       | SCO5089  | actinorhodin polyketide synthase acyl carrier protein ( <i>actI-ORF 3</i> )            | 0.000           | -6.16                    |                          |
|                                                       | SCO5090  | actinorhodin polyketide synthase bifunctional ( <i>actVII</i> ) cyclase/dehydratase    | 0.000           | -4.57                    |                          |
|                                                       | SCO5091  | cyclase ( <i>actIV</i> )                                                               | 0.002           | -3.74                    |                          |
|                                                       | SCO5092  | actinorhodin polyketide possible dimerase ( <i>actVB</i> )                             | 0.018           | -3.50                    |                          |
| <b>b) Calcium-dependent antibiotics</b>               |          |                                                                                        |                 |                          |                          |
|                                                       | SCO3217  | transcriptional activator for the CDA biosynthesis cluster ( <i>cdaR</i> )             | 0.008           | -1.41                    | -2.15 (± 0.64)           |
|                                                       | SCO3218  | putative small conserved hypothetical protein                                          | 0.001           | -3.22                    |                          |
|                                                       | SCO3220  | putative secreted protein                                                              | 0.000           | -3.41                    |                          |
|                                                       | SCO3221  | probable oxidoreductase                                                                | 0.001           | -3.04                    |                          |
|                                                       | SCO3222  | possible small secreted protein                                                        | 0.000           | -2.85                    |                          |
|                                                       | SCO3227  | putative aminotransferase                                                              | 0.021           | -2.61                    |                          |
|                                                       | SCO3229  | putative 4-hydroxyphenylpyruvic acid dioxygenase                                       | 0.005           | -2.77                    |                          |
|                                                       | SCO3230  | CDA peptide synthetase I ( <i>cdaPS1</i> )                                             | 0.010           | -2.66                    | -3.00 (± 0.99)           |
|                                                       | SCO3231  | CDA peptide synthetase II ( <i>cdaPS2</i> )                                            | 0.013           | -2.60                    | -4.55 (± 1.12)           |
|                                                       | SCO3232  | CDA peptide synthetase III ( <i>cdaPS3</i> )                                           | 0.022           | -2.21                    |                          |
|                                                       | SCO3233  | probable hydrolase                                                                     | 0.040           | -2.43                    |                          |

|                                                                                                          |                                                                                 |       |       |                  |
|----------------------------------------------------------------------------------------------------------|---------------------------------------------------------------------------------|-------|-------|------------------|
| SCO3234                                                                                                  | possible phosphotransferase                                                     | 0.002 | -2.98 |                  |
| SCO3235                                                                                                  | probable ABC transporter                                                        | 0.003 | -2.58 |                  |
| SCO3236                                                                                                  | possible oxygenase                                                              | 0.003 | -2.37 | -3.42 (± 0.55)   |
| SCO3244                                                                                                  | putative secreted protein                                                       | 0.000 | -2.86 |                  |
| SCO3245                                                                                                  | possible salicylate hydroxylase (putative secreted protein)                     | 0.035 | -1.98 |                  |
| SCO3247                                                                                                  | possible acyl CoA oxidase                                                       | 0.011 | -2.42 |                  |
| SCO3248                                                                                                  | probable 3-oxoacyl-[acyl carrier protein] synthase II ( <i>fabF3</i> )          | 0.000 | -2.40 |                  |
| SCO3249                                                                                                  | probable acyl carrier protein                                                   | 0.000 | -2.67 |                  |
| <b>c) Coelichelin</b>                                                                                    |                                                                                 |       |       |                  |
| SCO0489                                                                                                  | conserved hypothetical protein                                                  | 0.001 | -2.90 |                  |
| SCO0490                                                                                                  | putative esterase ( <i>cchJ</i> )                                               | 0.011 | -2.05 |                  |
| SCO0492                                                                                                  | putative peptide synthetase ( <i>cchH</i> )                                     | 0.007 | -2.29 | -2.18 (± 0.55)   |
| SCO0498                                                                                                  | putative peptide monooxygenase ( <i>cchB</i> )                                  | 0.010 | -3.14 | -1.48 (± 0.71)   |
| SCO0499                                                                                                  | putative formyltransferase                                                      | 0.016 | -2.25 |                  |
| <b>d) Yellow pigment and a compound with antibacterial activity (product of <i>cpk</i> gene cluster)</b> |                                                                                 |       |       |                  |
| SCO6272                                                                                                  | possible secreted FAD-binding protein                                           | 0.044 | -1.96 |                  |
| SCO6273                                                                                                  | probable type I polyketide synthase ( <i>cpkC</i> )                             | 0.006 | -2.40 | -2.38 (± 0.08)   |
| SCO6277                                                                                                  | putative epoxide hydrolase ( <i>cpkE</i> )                                      | 0.004 | -1.40 | -2.07 (± 0.22)   |
| SCO6279                                                                                                  | putative diaminobutyrate-pyruvate aminotransferase ( <i>cpkG</i> )              | 0.049 | -1.24 | -2.24 (± 0.25)   |
| <b>e) Grey polyketide spore pigment</b>                                                                  |                                                                                 |       |       |                  |
| SCO5318                                                                                                  | polyketide beta-ketoacyl synthase alpha ( <i>whiE-ORFIII</i> )                  | 0.000 | -3.80 |                  |
| <b>f) Undecylprodigiosin</b>                                                                             |                                                                                 |       |       |                  |
| SCO5877                                                                                                  | specific transcriptional activator for RED biosynthesis cluster ( <i>redD</i> ) | 0.035 | -1.27 | -1.45 (± 0.65)   |
| SCO5881                                                                                                  | specific transcriptional activator for RED biosynthesis cluster ( <i>redZ</i> ) | 0.006 | -1.46 | -1.22 (± 0.06)   |
| <b>5. Primary metabolism</b>                                                                             |                                                                                 |       |       |                  |
| <b>a) Phosphorus metabolism</b>                                                                          |                                                                                 |       |       |                  |
| SCO4139                                                                                                  | phosphate ABC transport system ATP-binding protein ( <i>pstB</i> )              | 0.000 | -2.44 |                  |
| SCO4140                                                                                                  | phosphate ABC transport system permease protein ( <i>pstA</i> )                 | 0.019 | -2.98 |                  |
| SCO4141                                                                                                  | phosphate ABC transport system permease protein ( <i>pstC</i> )                 | 0.000 | -1.97 |                  |
| SCO4142                                                                                                  | phosphate-binding protein precursor ( <i>pstS</i> )                             | 0.004 | -2.30 |                  |
| SCO4145                                                                                                  | polyphosphate kinase ( <i>ppk</i> )                                             | 0.002 | -2.03 |                  |
| <b>b) Sulphur metabolism</b>                                                                             |                                                                                 |       |       |                  |
| SCO6099                                                                                                  | adenylylsulfate kinase ( <i>cysC</i> )                                          | 0.002 | -2.27 |                  |
| SCO6102                                                                                                  | putative nitrite/sulphite reductase                                             | 0.022 | -2.16 |                  |
| <b>6. Other and hypothetical genes</b>                                                                   |                                                                                 |       |       |                  |
| SCO0162                                                                                                  | conserved hypothetical protein                                                  | 0.002 | 2.15  |                  |
| SCO0163                                                                                                  | conserved hypothetical protein                                                  | 0.024 | 2.08  |                  |
| SCO0168                                                                                                  | possible regulator protein                                                      | 0.001 | 2.03  |                  |
| SCO0169                                                                                                  | conserved hypothetical protein                                                  | 0.000 | 2.03  |                  |
| SCO0170                                                                                                  | conserved hypothetical protein                                                  | 0.001 | 2.40  |                  |
| SCO0171                                                                                                  | conserved hypothetical protein                                                  | 0.002 | 2.01  |                  |
| SCO0180                                                                                                  | conserved hypothetical protein                                                  | 0.018 | 2.06  |                  |
| SCO0181                                                                                                  | hypothetical protein                                                            | 0.005 | 2.05  |                  |
| SCO0184                                                                                                  | conserved hypothetical protein                                                  | 0.001 | 3.04  |                  |
| SCO2828                                                                                                  | probable amino acid ABC transporter protein, solute-binding component           | 0.016 | -2.31 |                  |
| SCO2829                                                                                                  | amino acid ABC transporter protein, integral membrane component                 | 0.014 | -2.13 |                  |
| SCO2830                                                                                                  | probable amino acid ABC transporter protein, integral membrane component        | 0.000 | -1.98 |                  |
| SCO2831                                                                                                  | probable amino acid ABC transporter protein, ATP-binding component              | 0.002 | -1.97 |                  |
| SCO3595                                                                                                  | probable D-alanine:D-lactate ligase ( <i>ddlA2</i> , <i>vanA</i> )              | 0.001 | -4.01 |                  |
| SCO4173                                                                                                  | hypothetical protein SCD66.10c                                                  | 0.000 | 14.97 | 70.41 (± 1.10)   |
| SCO4174                                                                                                  | putative integral membrane protein                                              | 0.000 | 6.05  | 305.02 (± 90.89) |
| SCO4175                                                                                                  | hypothetical protein SCD66.12c                                                  | 0.000 | 16.75 | 243.8 (± 38.00)  |
| SCO4176                                                                                                  | conserved hypothetical protein                                                  | 0.001 | 2.15  |                  |
| SCO4214                                                                                                  | putative AbaA-like regulatory protein                                           | 0.000 | 28.47 | 325.17 (± 56.75) |

|         |                                                          |       |       |
|---------|----------------------------------------------------------|-------|-------|
| SCO4873 | hypothetical protein                                     | 0.020 | -2.39 |
| SCO4874 | possible integral membrane protein                       | 0.002 | -2.91 |
| SCO4879 | conserved hypothetical protein                           | 0.001 | -3.81 |
| SCO4880 | possible transferase                                     | 0.004 | -2.06 |
| SCO4881 | possible polysaccharide biosynthesis related protein     | 0.002 | -3.83 |
| SCO4882 | hypothetical protein                                     | 0.000 | -6.02 |
| SCO7511 | glyceraldehyde 3-phosphate dehydrogenase ( <i>gap2</i> ) | 0.000 | 3.27  |

<sup>a</sup> Fold changes represent the ratio of the expression levels in the comparison of *S. coelicolor*  $\Delta wdpC$  and wild type strain M145; positive or negative value indicate genes up- or down-regulated in the  $\Delta wdpC$  mutant.

---

**Table S3** Transcription profiles of selected genes in the  $\Delta wdpB$  mutant during *S. coelicolor* life cycle.

| Gene no. (name)           | Time of cultivation (h) |                      |                     |                     |
|---------------------------|-------------------------|----------------------|---------------------|---------------------|
|                           | 28                      | 48                   | 72                  | 96                  |
| SCO0194 ( <i>litS</i> )   | 1,14 ( $\pm$ 0,01)      | -4,65 ( $\pm$ 0,92)  | -3,12 ( $\pm$ 0,74) | -2,04 ( $\pm$ 0,40) |
| SCO1674 ( <i>chpC</i> )   | -3,46 ( $\pm$ 1,17)     | -2,69 ( $\pm$ 0,60)  | 1,19 ( $\pm$ 0,59)  | -1,72 ( $\pm$ 0,53) |
| SCO1675 ( <i>chpH</i> )   | -3,73 ( $\pm$ 1,93)     | -10,24 ( $\pm$ 3,69) | -6,54 ( $\pm$ 1,43) | -2,85 ( $\pm$ 1,92) |
| SCO1800 ( <i>chpE</i> )   | -2,14 ( $\pm$ 0,98)     | -1,97 ( $\pm$ 0,20)  | -3,43 ( $\pm$ 0,63) | -1,99 ( $\pm$ 0,61) |
| SCO2718 ( <i>rdlA</i> )   | -1,19 ( $\pm$ 0,71)     | -15,19 ( $\pm$ 7,95) | 1,17 ( $\pm$ 0,14)  | -2,01 ( $\pm$ 0,87) |
| SCO2719 ( <i>rdlB</i> )   | -1,13 ( $\pm$ 0,17)     | -9,59 ( $\pm$ 3,14)  | -1,4 ( $\pm$ 0,57)  | -1,34 ( $\pm$ 0,60) |
| SCO3217 ( <i>cdaR</i> )   | -1,05 ( $\pm$ 0,33)     | -1,88 ( $\pm$ 0,63)  | -1,34 ( $\pm$ 0,79) | -1,22 ( $\pm$ 0,01) |
| SCO3231 ( <i>cdaPS2</i> ) | -1,84 ( $\pm$ 0,64)     | -2,67 ( $\pm$ 0,39)  | -1,7 ( $\pm$ 1,23)  | -2,83 ( $\pm$ 0,35) |
| SCO4002 ( <i>nepA</i> )   | -13,12 ( $\pm$ 2,61)    | -4,31 ( $\pm$ 0,59)  | nt                  | -3,59 ( $\pm$ 0,76) |
| SCO5819 ( <i>whiH</i> )   | -1,02 ( $\pm$ 0,15)     | -3,42 ( $\pm$ 0,01)  | 1,27 ( $\pm$ 0,68)  | -1,38 ( $\pm$ 0,61) |
| SCO5953 ( <i>wdpB</i> )   | 40,86 ( $\pm$ 0,50)     | 19,54 ( $\pm$ 3,74)  | 13,47 ( $\pm$ 4,79) | 14,33 ( $\pm$ 1,48) |
| SCO5954                   | 20,88 ( $\pm$ 8,88)     | 34,51 ( $\pm$ 7,14)  | 16,94 ( $\pm$ 4,99) | 30,70 ( $\pm$ 6,28) |
| SCO6073 ( <i>geoA</i> )   | -2,85 ( $\pm$ 0,28)     | -3,32 ( $\pm$ 1,01)  | -1,14 ( $\pm$ 0,27) | -1,18 ( $\pm$ 0,06) |
| SCO6682 ( <i>ramS</i> )   | -30,00 ( $\pm$ 14,84)   | -17,52 ( $\pm$ 7,15) | -4,49 ( $\pm$ 1,07) | -3,11 ( $\pm$ 1,39) |
| SCO6685 ( <i>ramR</i> )   | -3,28 ( $\pm$ 1,08)     | -2,27 ( $\pm$ 0,51)  | 1,49 ( $\pm$ 0,93)  | nt                  |
| SCO6992 ( <i>absR1</i> )  | -1,20 ( $\pm$ 0,04)     | -8,95 ( $\pm$ 4,23)  | 1,21 ( $\pm$ 0,17)  | -1,07 ( $\pm$ 0,07) |
| SCO7701                   | -2,12 ( $\pm$ 1,09)     | -3,34 ( $\pm$ 0,80)  | -1,48 ( $\pm$ 1,31) | -1,86 ( $\pm$ 0,49) |

Total RNA isolated from different development stages of life cycle (after 28, 48, 72 and 96 hours of cultivation on modified R3 plates) was transcribed into cDNA which was used as a template for qRT-PCR. The data represent the ratio of the expression levels in the comparison of *S. coelicolor*  $\Delta wdpB$  and wild type strain M145; positive or negative value indicate genes up- or down-regulated in the  $\Delta wdpB$  mutant. nt – not tested.

**Table S4** Transcription profiles of selected genes in the  $\Delta wdpC$  mutant during *S. coelicolor* life cycle.

| Gene (name)                   | Time of cultivation (h) |                     |                       |                     |                     |
|-------------------------------|-------------------------|---------------------|-----------------------|---------------------|---------------------|
|                               | 28                      | 48                  | 64                    | 72                  | 96                  |
| SCO2244 ( <i>wdpC</i> )       | 13,77 ( $\pm$ 4,42)     | 27,33 ( $\pm$ 9,03) | 34,51 ( $\pm$ 6,64)   | 29,2 ( $\pm$ 7,43)  | 25,00 ( $\pm$ 8,05) |
| SCO3231 ( <i>cdaPS2</i> )     | 1,14 ( $\pm$ 0,56)      | -2,29 ( $\pm$ 0,45) | -4,55 ( $\pm$ 1,12)   | -3,39 ( $\pm$ 0,41) | -1,73 ( $\pm$ 0,93) |
| SCO4174                       | 4,08 ( $\pm$ 1,06)      | 45,70 ( $\pm$ 5,57) | 305,02 ( $\pm$ 90,89) | 7,88 ( $\pm$ 0,40)  | 6,93 ( $\pm$ 0,40)  |
| SCO4214                       | 10,80 ( $\pm$ 2,80)     | 30,69 ( $\pm$ 2,44) | 325,17 ( $\pm$ 56,75) | 18,65 ( $\pm$ 5,41) | 7,63 ( $\pm$ 2,55)  |
| SCO5085 ( <i>actII-ORF4</i> ) | -1,03 ( $\pm$ 0,13)     | -1,27 ( $\pm$ 0,19) | -4,23 ( $\pm$ 0,68)   | -2,31 ( $\pm$ 0,27) | -2,64 ( $\pm$ 0,70) |
| SCO5087 ( <i>actI-ORF1</i> )  | -1,36 ( $\pm$ 0,07)     | 1,18 ( $\pm$ 0,69)  | -6,93 ( $\pm$ 3,41)   | -4,59 ( $\pm$ 1,46) | -2,47 ( $\pm$ 0,08) |
| SCO6682 ( <i>ramS</i> )       | -1,98 ( $\pm$ 0,03)     | -1,60 ( $\pm$ 0,42) | -2,35 ( $\pm$ 0,49)   | -2,03 ( $\pm$ 0,85) | -1,07 ( $\pm$ 0,07) |
| SCO6685 ( <i>ramR</i> )       | -2,78 ( $\pm$ 1,68)     | 1,03 ( $\pm$ 0,06)  | nt                    | 1,63 ( $\pm$ 0,26)  | nt                  |

Total RNA isolated from different development stages of life cycle (after 28, 48, 72 and 96 hours of cultivation on modified R3 plates) was transcribed into cDNA which was used as a template for qRT-PCR. The data represent the ratio of the expression levels in the comparison of *S. coelicolor*  $\Delta wdpC$  and wild type strain M145; positive or negative value indicate genes up- or down-regulated in the  $\Delta wdpC$  mutant. nt – not tested.

**Table S5** List of primers used in cotranscription analyses

| Oligonucleotide | Abbreviation | Sequence in direction 5' - 3' | PCR amplification product |
|-----------------|--------------|-------------------------------|---------------------------|
| SCO2245_F       | 1            | ATGACCGGT AAGGACACACC         | 319 bp                    |
| R2wdpC_up       | 2            | GTGCGTCCGAGGT AGACG           |                           |
| SCO2246_F       | 3            | TCCGGAAC T CAGTTTGTCC         | 536 bp                    |
| SCO2245_R       | 4            | ACGAACATCGTCCAGGT CAC         |                           |
| SCO2247_F       | 5            | AAATCCCGGACAGGCT AATC         | 788 bp                    |
| SCO2246_R       | 6            | CTC CACTTCCAGCAGGT GTT        |                           |
| SCO5951_F       | a            | GT CGT CAGGACGCT CGAC         | 1043 bp                   |
| SCO5952_R       | b            | ATGGT GATCGCCAGGT ACTC        |                           |
| SCO5952_F       | c            | ACTGAGCGAACT GACCTTCG         | 930 bp                    |
| wdpB_upR        | d            | CTCGAAGT ACCCCGACAGAC         |                           |
| FwdpB           | e            | ATCACCT ACAACATGT CCGA        | 1334 bp                   |
| SCO5954R        | f            | GAGGT TCTCGAAGGCGT AGT        |                           |

**Table S6** List of primers used in qRT-PCR

| Gene no. | Oligonucleotide | Sequence in direction 5' - 3' | Gene no. | Oligonucleotide | Sequence in direction 5' - 3' |
|----------|-----------------|-------------------------------|----------|-----------------|-------------------------------|
| SCO0194  | SCO0194F        | GT ACT CGACCGGT ACT GCT       | SCO4214  | SCO4214F2       | ATCGACCGT TATCCGTGT G         |
|          | SCO0194R        | GCGT CAGGT CCT CGT AGAAG      |          | SCO4214R2       | GCT GGT AGGGAGT GACGAAC       |
| SCO0492  | SCO0492F        | TTCGTCTCCAGA ACTTCT           | SCO4677  | SCO4677F        | GCT CACCCT GT ACGTCGT C       |
|          | SCO0492R        | ACCCAGGT GAAGGGAT AGT G       |          | SCO4677R        | GT CGGAGGCAGGCT TTT           |
| SCO0498  | SCO0498F        | ACAGCGGT GAT GGA CT AC        | SCO5074  | SCO5074F        | CACCCGGT CT ACGACT ACG        |
|          | SCO0498R        | ACCTTCTCCGGT ACATCTG          |          | SCO5074R        | CTGGT TGTACTCGGCGAAG          |
| SCO0828  | SCO0828F        | GCGCT ACT CGCT CT ACAAGA      | SCO5080  | SCO5080F        | GT CAGCGT CGT GGAT CACT       |
|          | SCO0828R        | CGT AGT TGTCTCGGT CTCG        |          | SCO5080R        | CTGT CGACGAT CCCGT ACT        |
| SCO1674  | SCO1674F2       | GGT GGGGACCACT CGAC           | SCO5085  | SCO5085F        | TGGGACGT GT CCAT GT AATC      |
|          | SCO1674R2       | GGCT TGT CCGGGT ATC           |          | SCO5085R        | CACAACT CCT CGATGAGCAC        |
| SCO1675  | SCO1675F        | GGCAACGT CGT T CAGGT T        | SCO5087  | SCO5087F        | AGGAGCT GT TCGATTGAAG         |
|          | SCO1675R        | TCACTTGTGATGCAGACGT T         |          | SCO5087R        | GAGGT GAGCAGT TCCCAGA         |
| SCO1800  | SCO1800F        | CCGGT GGCCT GAT CG            | SCO5318  | SCO5318F        | GATGAGCT CCAT CAAGTCCA        |
|          | SCO1800R        | GT T GACCGGGAT GT GGAT        |          | SCO5318R        | CGT AGT CCAGGT CGCACT C       |
| SCO1845  | SCO1845F        | ACACGAT CT CCAAGGGT CTC       | SCO5321  | SCO5321F        | CTCTTCCACAACGT CAGCAT         |
|          | SCO1845R        | GT CAGGAGGT TCCAGAGGAT        |          | SCO5321R        | GT TCTCGT CCGTCAGGT AGC       |
| SCO2217  | SCO2217F        | ACACAAGAAAACGCCGT ACA         | SCO5819  | SCO5819F        | GAGGACGT CCAGCAGAGG           |
|          | SCO2217R        | TAGAAGT TGGCCAGACCAG          |          | SCO5819R        | AGGGT GT GGA ACT CGGT ATC     |
| SCO2244  | wdpC_downF      | CTCACCCACAAGT TCGTCAC         | SCO5877  | SCO5877F2       | GACCT GGT GGACGA ACT GT       |
|          | wdpC_downR      | GCCAGGT TCCACAGGAGT A         |          | SCO5877R2       | ACGCT CGT T GAGCACTTTC        |
| SCO2245  | SCO2245_F       | ATGACCCGGT AAGGACACACC        | SCO5881  | SCO5881F        | CATCAGAACCAT CACCGAAG         |
|          | SCO2245_R       | ACGAACAT CGT CCAGGT CAC       |          | SCO5881R        | CCCT GGGT CAGT AAGAGGAG       |
| SCO2717  | SCO2717F        | GGCAACGT CAT CCAGGT T         | SCO5953  | wdpB_upF        | GCCAAGGAGAT CGAGT TCTG        |
|          | SCO2717R        | CAGT CGT TCTCGCACTTGT T       |          | wdpB_upR        | CTCGAAGT ACCCCGACAGAC         |
| SCO2718  | SCO2718F        | AGCT GT CGCT GGT CGAG         | SCO5954  | SCO5954F        | CTCAAGGT CCGGT ACT TCGT       |
|          | SCO2718R        | AGGACGT T GAT GT CCTGGAT      |          | SCO5954R        | GAGGT TCTCGAAGGCGT AGT        |
| SCO2719  | SCO2719F        | GT ACT TCGGCAACT CGATGA       | SCO6073  | SCO6073F        | ACTTCTTCGGCGT CGACT AT        |
|          | SCO2719R        | ACCAGACCGAT GACACT GAC        |          | SCO6073R        | GAGAGCT GGAAGT CGT CGT A      |
| SCO3217  | SCO3217F        | TGCGCT ACT ACCTGATGCT C       | SCO6099  | SCO6099F        | GACCT GCGCAT CGAGT C          |
|          | SCO3217R        | AGGT CCGT ACCCAGT TCAAG       |          | SCO6099R        | CAGTCCCCT TTCGGT GAG          |
| SCO3230  | SCO3230F        | AACGT CGT ACGGCT CTCTC        | SCO6273  | SCO6273F        | GAGAT GAT GACGT CGGACAC       |
|          | SCO3230R        | CACACCGAGAAGT CGAAGG          |          | SCO6273R        | GGCCACAT ACT TCTCGAACA        |
| SCO3231  | SCO3231F        | GAGAT CGAAACCACCT CAC         | SCO6277  | SCO6277F        | CAACAACCT CCT CCGT GAC        |
|          | SCO3231R        | CACGGT GT TCTCGT CGTATC       |          | SCO6277R        | GGT GACGT ACT CCT CCGT CT     |
| SCO3236  | SCO3236F        | TTCCTGCCGGAAGAAGC             | SCO6279  | SCO6279F        | GGT TCT TCGGCT ACT TCGTC      |
|          | SCO3236R        | GT TCTCGT TGTGGAACGT CA       |          | SCO6279R        | TCTCTCGTCCGT GACATAC          |
| SCO3476  | SCO3476F        | GATCATCAACCTCGCATCAC          | SCO6681  | SCO6681F        | GAGACT GGCCGAGT ACACC         |
|          | SCO3476R        | ATT CATTGCACAGAGCCTTG         |          | SCO6681R        | CAGGT CGT TGAAGACCACAC        |
| SCO3480  | SCO3480F        | GGCT ACACCT ACACGGT CAA       | SCO6682  | SCO6682F        | ACCTGCAGT CGATGGAGAC          |
|          | SCO3480R        | TGACT GCCAT ATCTTCTCG         |          | SCO6682R        | TACAGGT GGT GAT GCTCAGG       |
| SCO3483  | SCO3483F        | AACGCCT AT CCGCT CTCTA        | SCO6685  | SCO6685F        | ACTGCT CAGATCCGACGAC          |
|          | SCO3483R        | AAGGCGGT CGT GT AGT TCTC      |          | SCO6685R        | TCCGTCCACGACACAGAC            |
| SCO4002  | SCO4002_F       | ACGACAACAACGGCAACT C          | SCO6992  | SCO6992F        | GGACCT TCCACAACATCCTG         |
|          | SCO4002_R       | CTGGT T GATCGACGT GAAG        |          | SCO6992R        | GGAGAACGGGT ACTCCATGA         |
| SCO4142  | SCO4142F2       | CGAAGAAGGT CTGCAAGGAC         | SCO7035  | SCO7035F        | CTGAT GACCT CCGAGATGG         |
|          | SCO4142R2       | T TGGT GATCTTGCTGT CGAA       |          | SCO7035R        | GAGAACCAGCGGAAGA ACT C        |
| SCO4173  | SCO4173F        | CTGCT GGA CT CGCT CCTG        | SCO7257  | SCO7257F        | GAAGGAAGCGGAAAGGATTC          |
|          | SCO4173R        | CCTCT GCACGAAGACCTG           |          | SCO7257R        | GAGT CGT TCGT CGACTCGT        |
| SCO4174  | SCO4174F        | GACTGCCCT ACGAGGAGT G         | SCO7701  | SCO7701F        | GCACAGCGAGT ACGAGAAGA         |
|          | SCO4174R        | GGT GGT CCGGAT GGAAC          |          | SCO7701R        | GAGGT GGT CCAT GAGGAACT       |
| SCO4175  | SCO4175F        | AACAGAACCGCCACCT AC           | SCO5820  | hrdBF           | CGGT CAGCT TCACTGCT           |
|          | SCO4175R        | AGCGGT CGGAGCAGCAC            | (hrdB)   | hrdBR           | GT ACACCT TGCCGAT CTCGT       |
